# Supplementary material for: Inflammatory and neuroimmune imbalance in diabetic incontinence: Insights from serum biomarker profiling
Source: Research Square preprint supplement (doi:10.21203/rs.3.rs-7479351/v1), 2025-09-11
Supplement: Supplementary file 1 [file 7328d3ffb2821a47bced5835.docx]

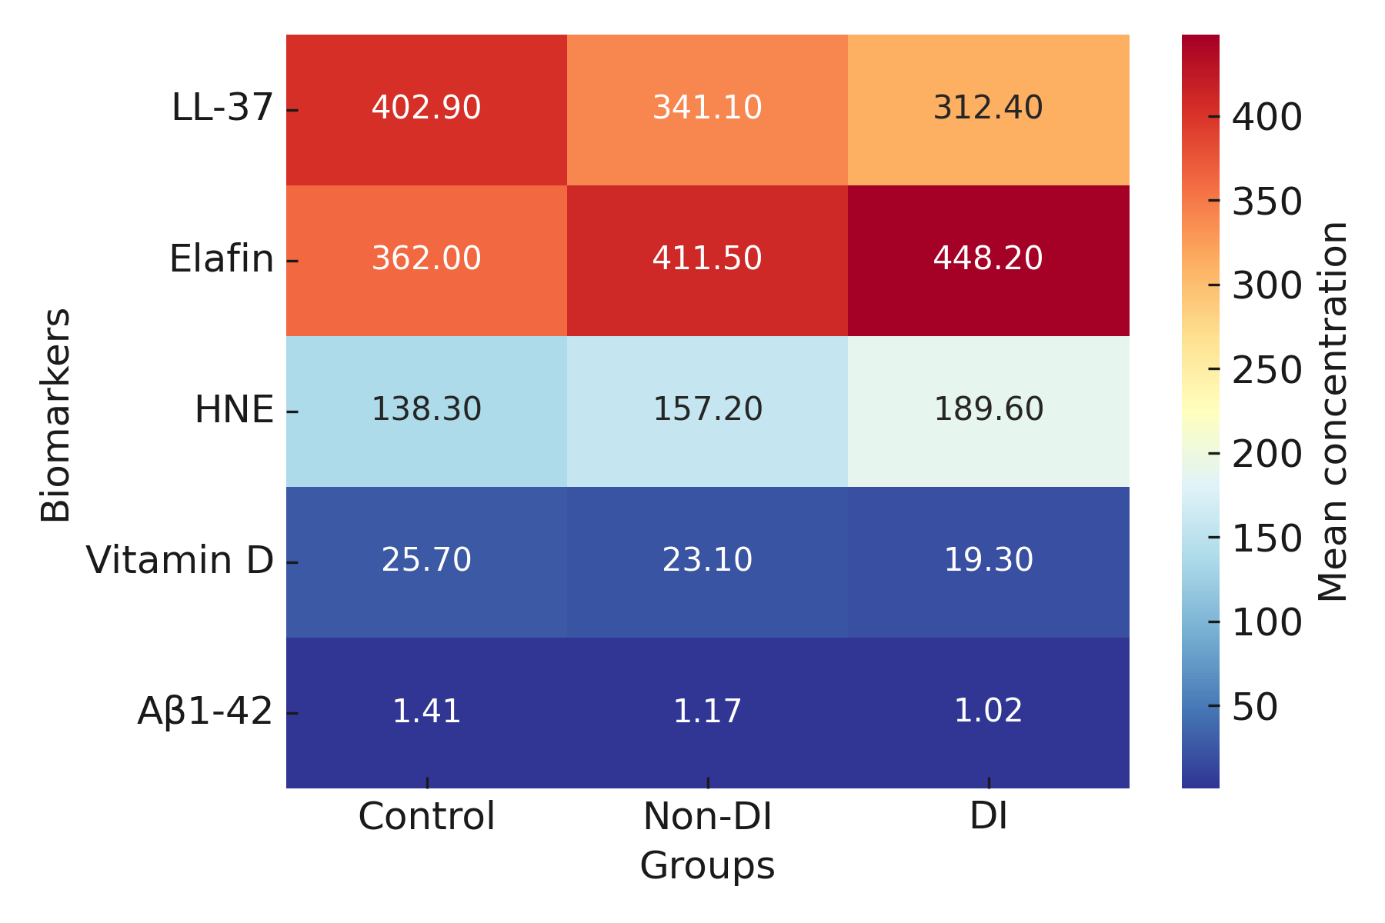


**Supplementary Figure S1.** Heatmap of biomarker distribution across study groups.
Each column represents an individual participant, and each row a biomarker. Higher values are displayed in red, lower values in blue. Diabetic incontinence patients exhibited the most divergent biomarker profile.
